# Supplementary material for: Effects of heterocyclic-based head group modifications on the structure–activity relationship of tocopherol-based lipids for non-viral gene delivery
Source: Royal Society of Chemistry journal article supplement (doi:10.1039/c6ob00974c), 2016-01-01
Supplement: c6ob00974c1.pdf [file c6ob00974c1.pdf]

## Effect of Heterocyclic-based Head group Modifications on the Structure-Activity Relationship of Tocopherol-based Lipids for Non-viral Gene Delivery

Mallikarjun Gosangi<sup>a</sup>, Thasneem Yoosuf Mujahid<sup>b</sup>, Vijaya Gopal<sup>\*b</sup>, Srilakshmi Patri<sup>\*a</sup>

<sup>a</sup>National Institute of Technology, Warangal-506004, Telangana

<sup>b</sup>CSIR-Centre for Cellular and Molecular Biology, Uppal Road, Hyderabad-500007,

\*Authors to whom the correspondence should be addressed:

P. V. Srilakshmi; E-mail: [patrisrilakshmi@gmail.com](mailto:patrisrilakshmi@gmail.com)

Vijaya Gopal: E-mail: [vijaya@ccmb.res.in](mailto:vijaya@ccmb.res.in) or [vg562000@gmail.com](mailto:vg562000@gmail.com)

### Supporting information

#### Table of Contents:

- 1) <sup>1</sup>H-NMR, <sup>13</sup>C-NMR and ESI-MS (HRMS) spectra of all lipid molecules including the intermediate (Fig. S1-S21)
- 2) Agarose gel binding assay using L2K (Fig. S22)
- 3) Ethidium bromide displacement assay using L2K (Fig. S23)
- 4) Comparative analysis of cell viability (%) of L2K: DNA complex using MTT assay (Fig. S24).

**(1) Toc-Br**

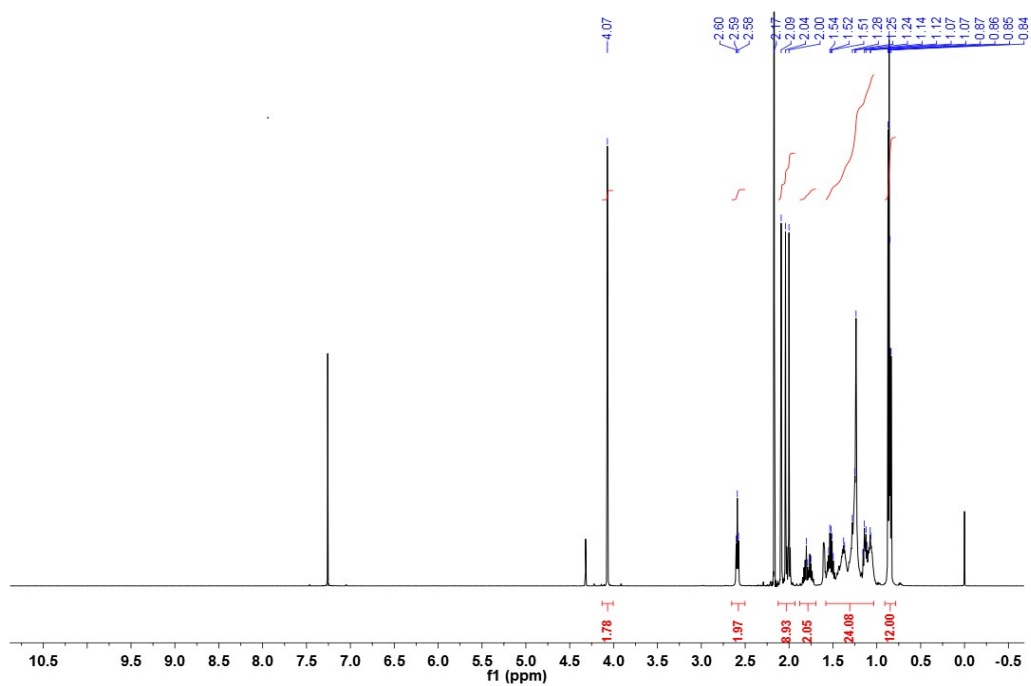

**Fig. S1: <sup>1</sup>H-NMR Spectrum of Toc-Br**

**(2) Toc-Tme**

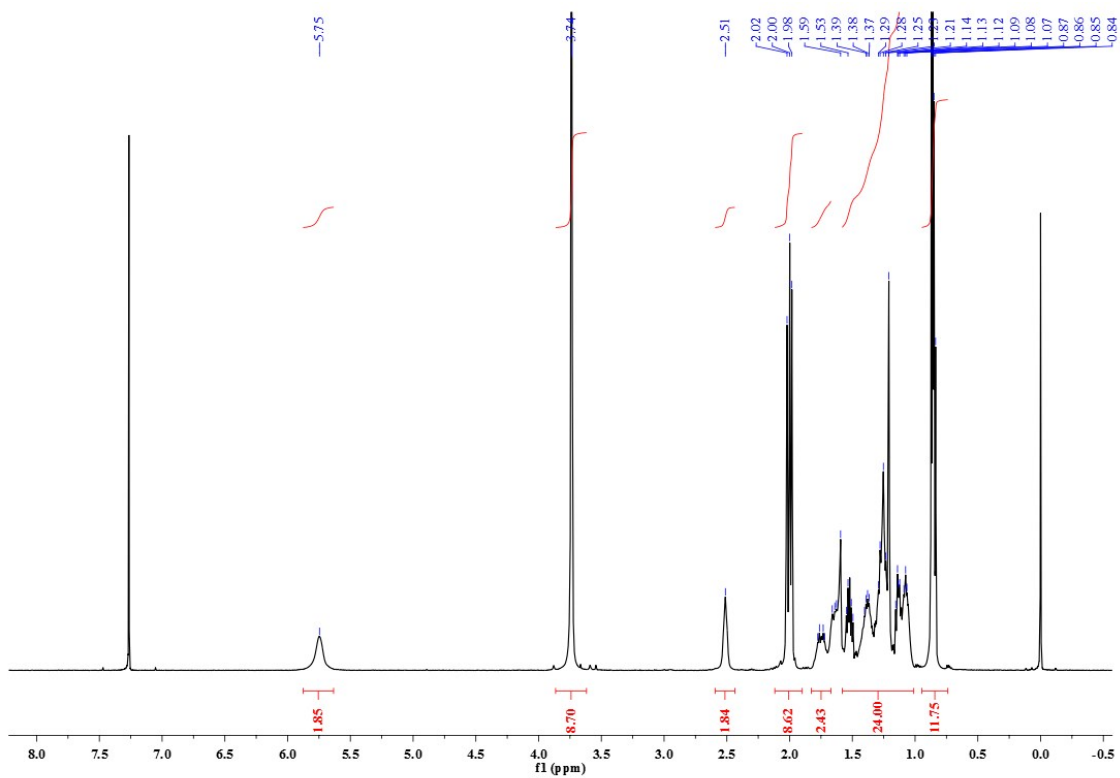

**Fig. S2: <sup>1</sup>H-NMR Spectrum of Toc-Tme**

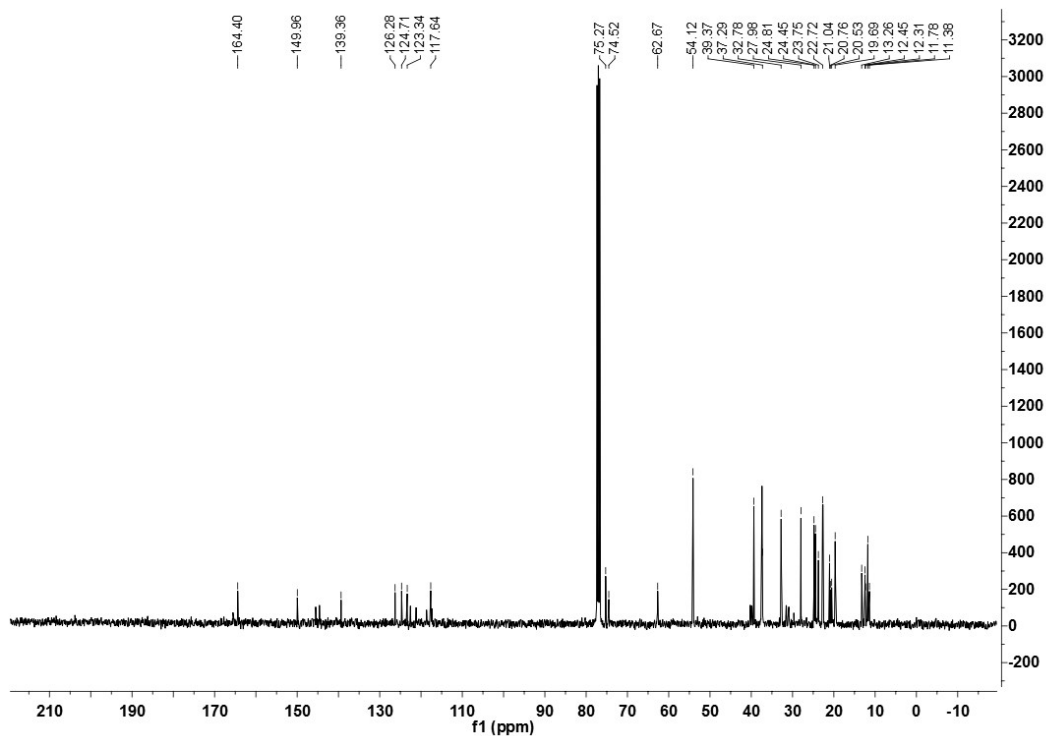

**Fig. S3:**  $^{13}\text{C}$ -NMR Spectrum of **Toc-Tme**

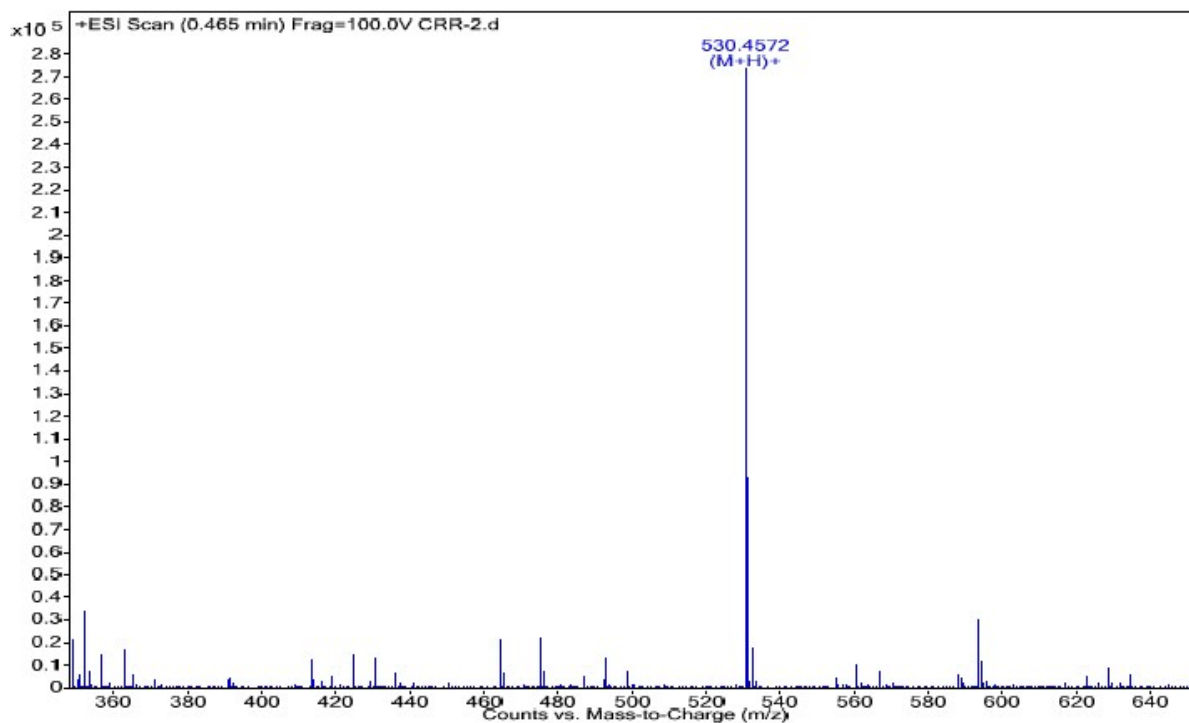

**Fig. S4:** ESI-MS (HRMS) Spectrum of **Toc-Tme**

### (3) Toc-Pyr

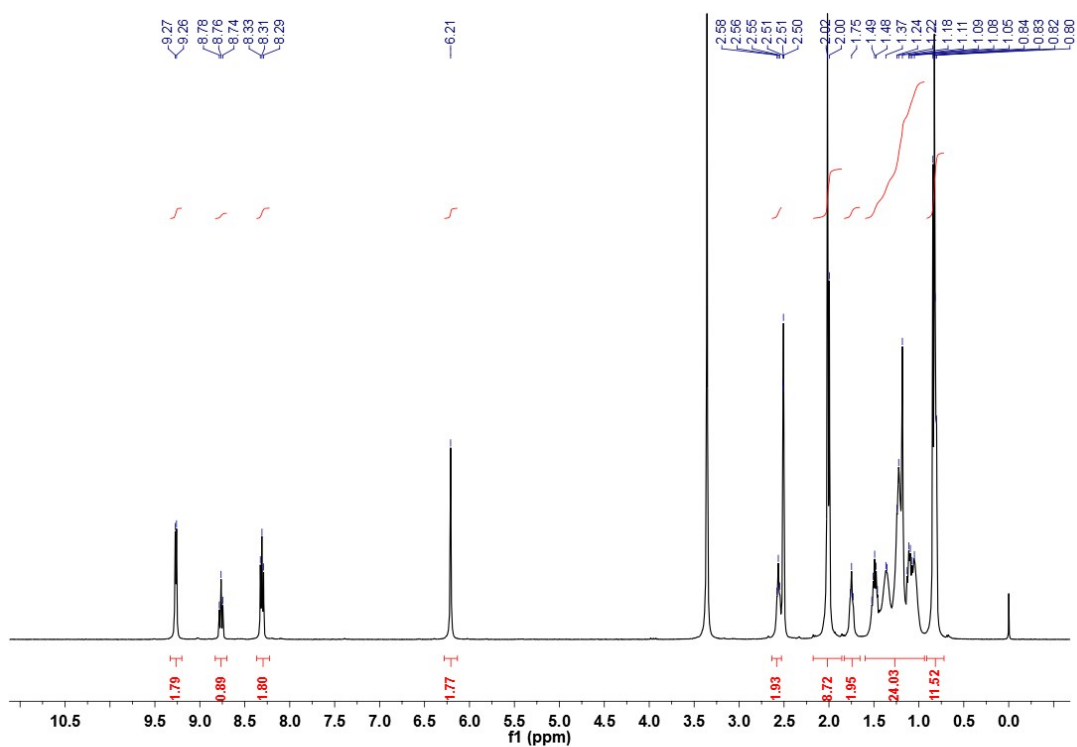

Fig. S5: <sup>1</sup>H-NMR Spectrum of Toc-Pyr

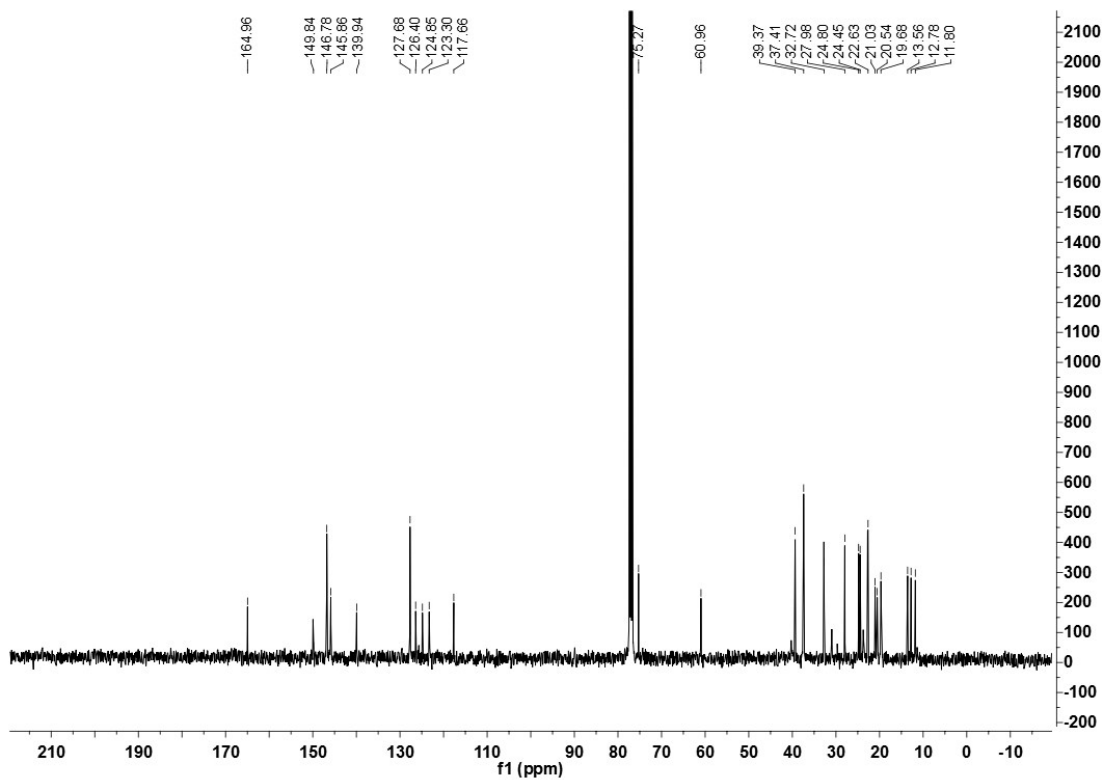

Fig. S6: <sup>13</sup>C-NMR Spectrum of Toc-Pyr



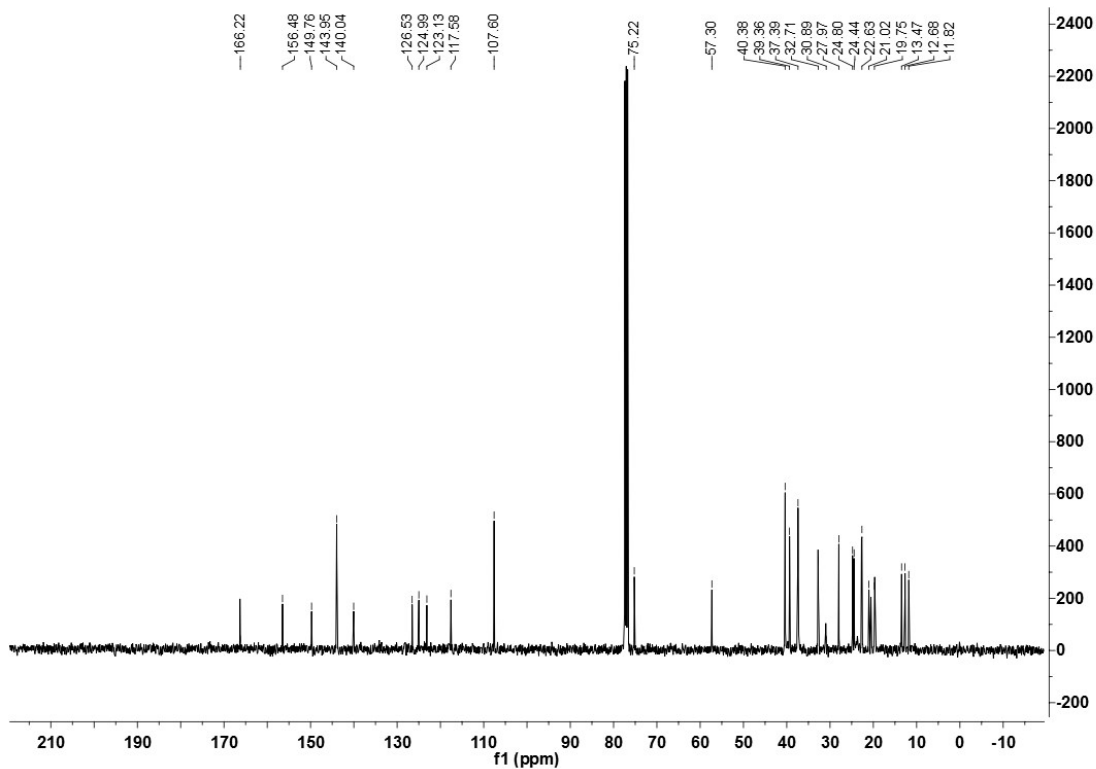

**Fig. S9:**  $^{13}\text{C}$ -NMR Spectrum of Toc-Dm

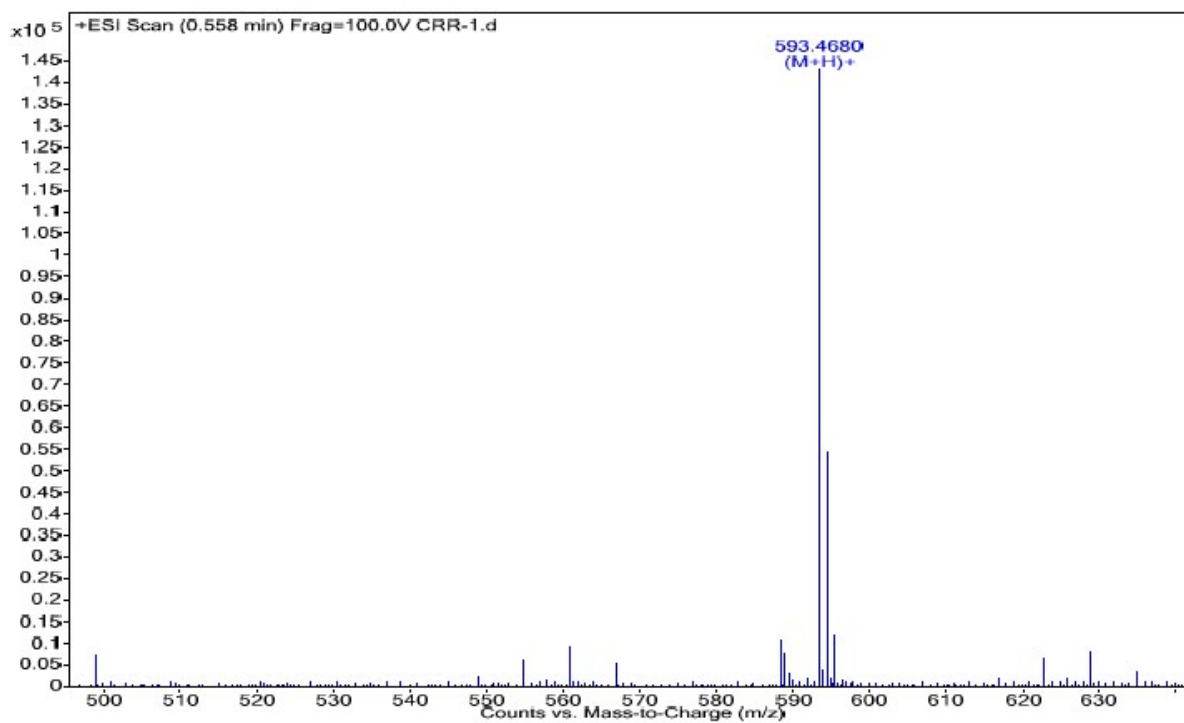

**Fig. S10:** ESI-MS (HRMS) Spectrum of Toc-Dm

## (5) Toc-Db

1507-1042  
P1507-1042 M3

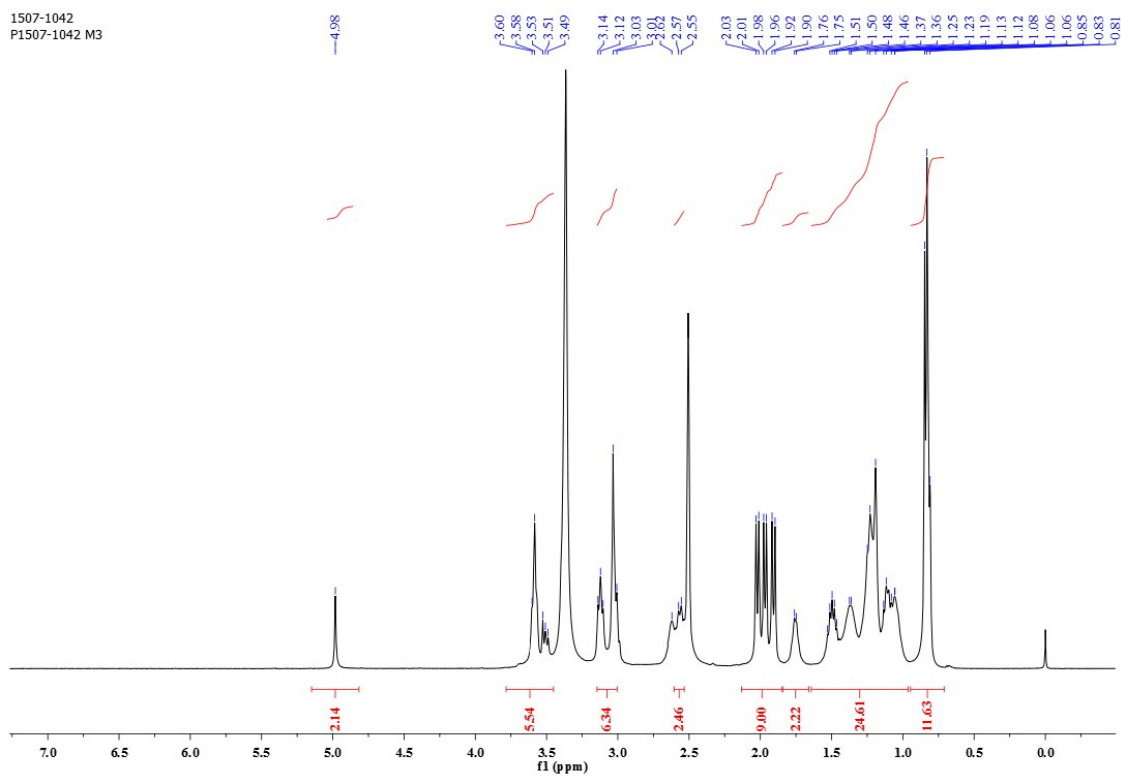

Fig. S11: <sup>1</sup>H-NMR Spectrum of Toc-Db

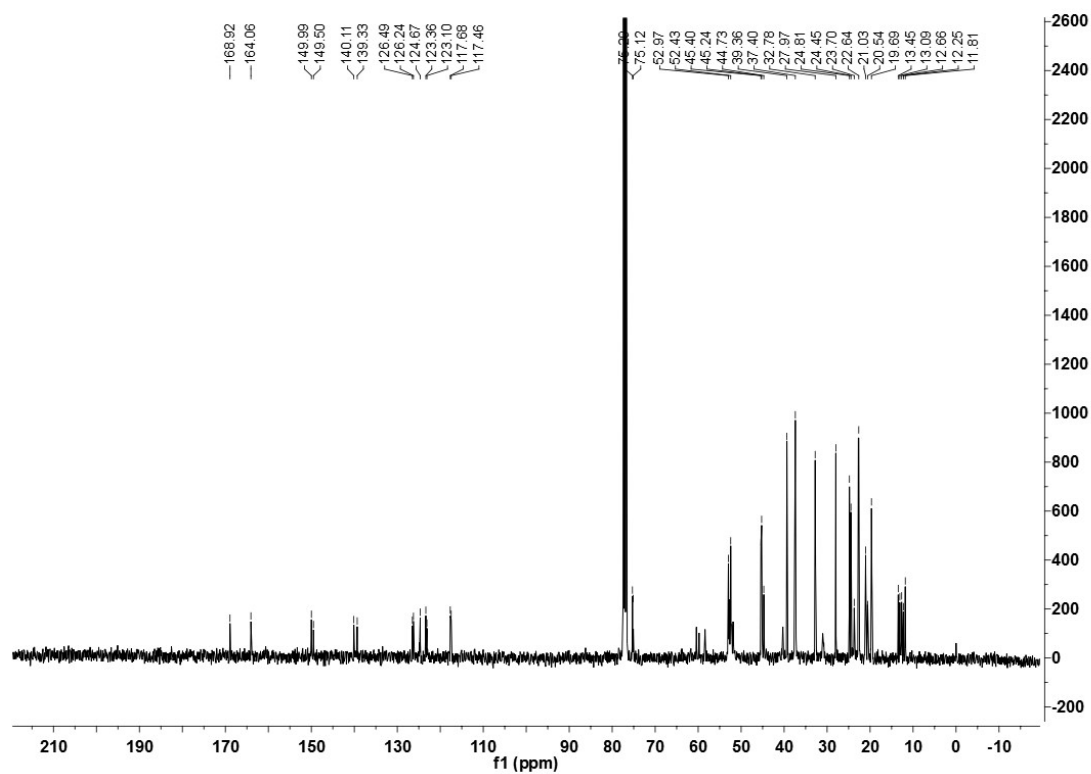

Fig. S12: <sup>13</sup>C-NMR Spectrum of Toc-Db

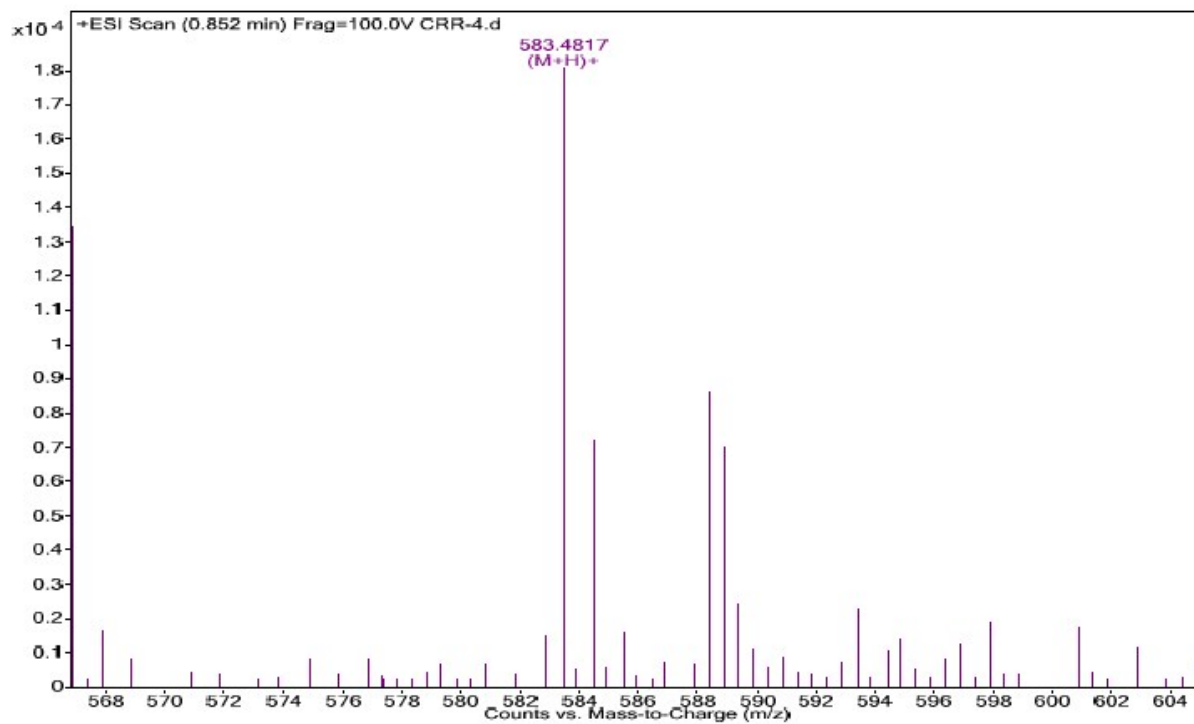

**Fig. S12:** ESI-MS (HRMS) Spectrum of **Toc-Db**

**(6) Toc-Pip**

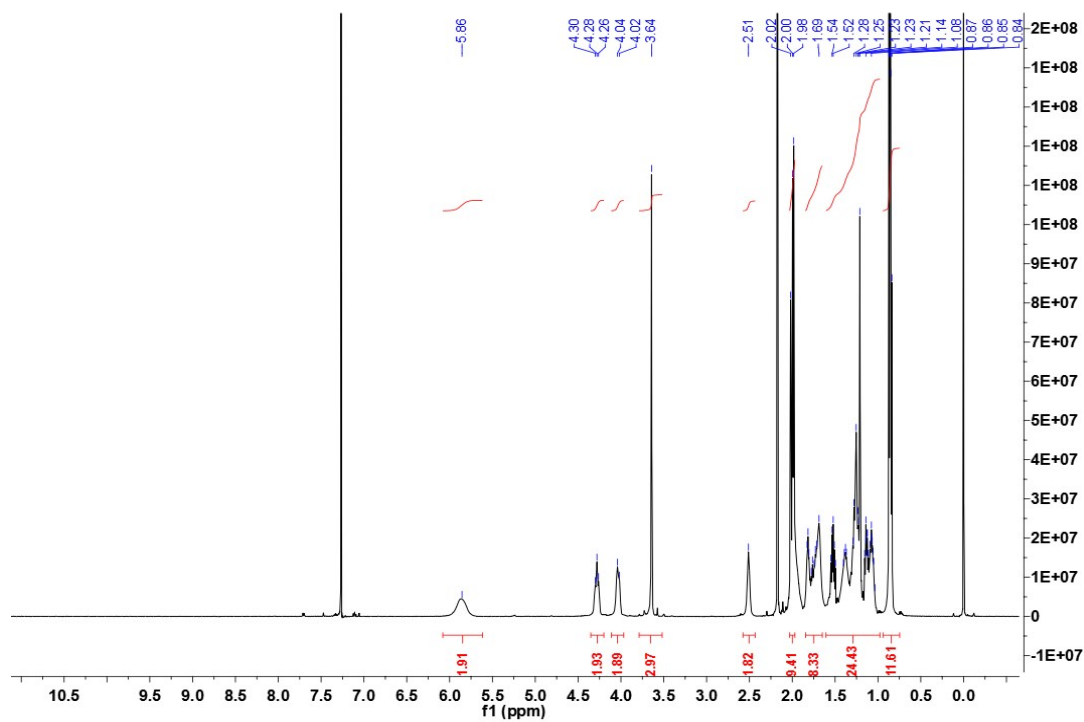

**Fig. S13:** <sup>1</sup>H-NMR Spectrum of **Toc-Pip**



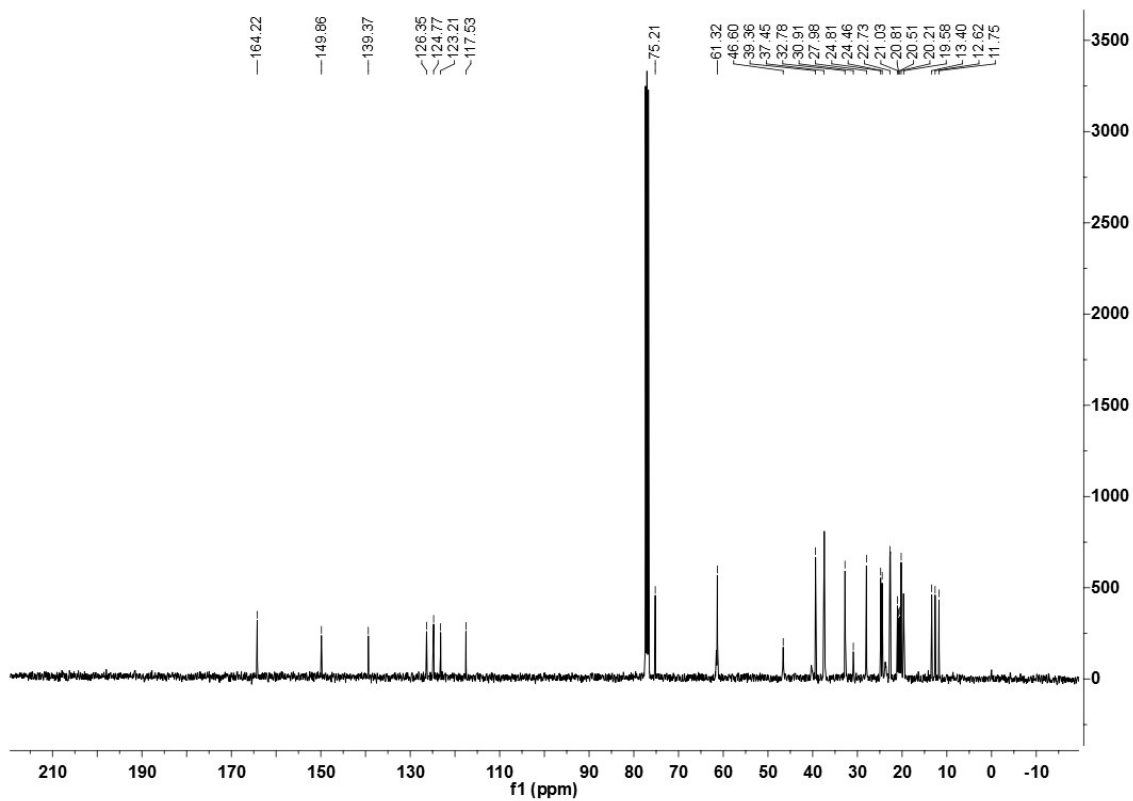

Fig. S14:  $^{13}\text{C}$ -NMR Spectrum of Toc-Pip

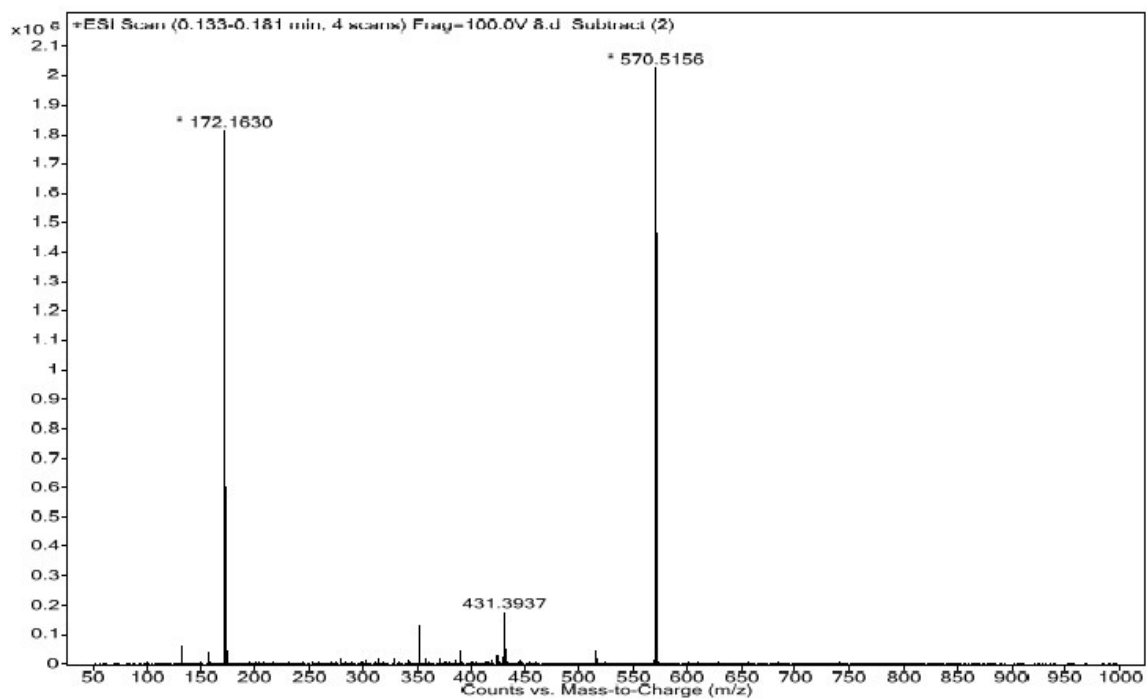

Fig. S15: ESI-MS (HRMS) Spectrum of Toc-Pip

(7) Toc-Mor

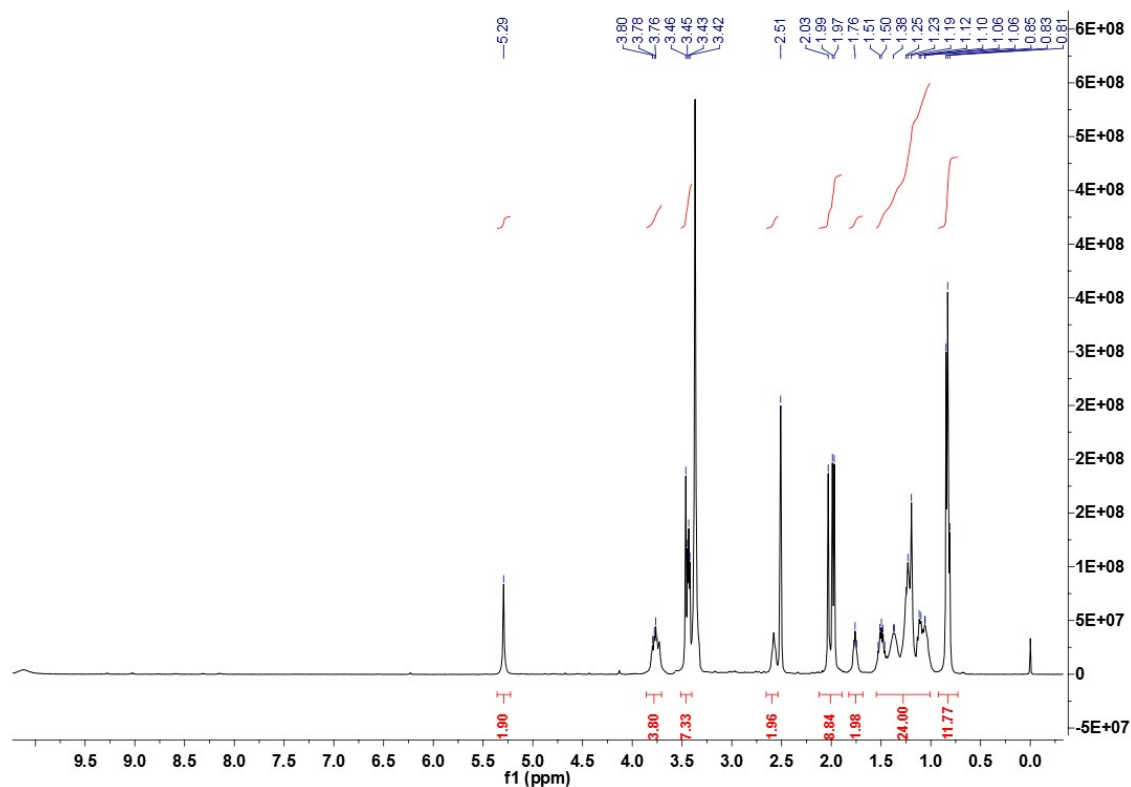

Fig. S16: <sup>1</sup>H-NMR Spectrum of Toc-Mor

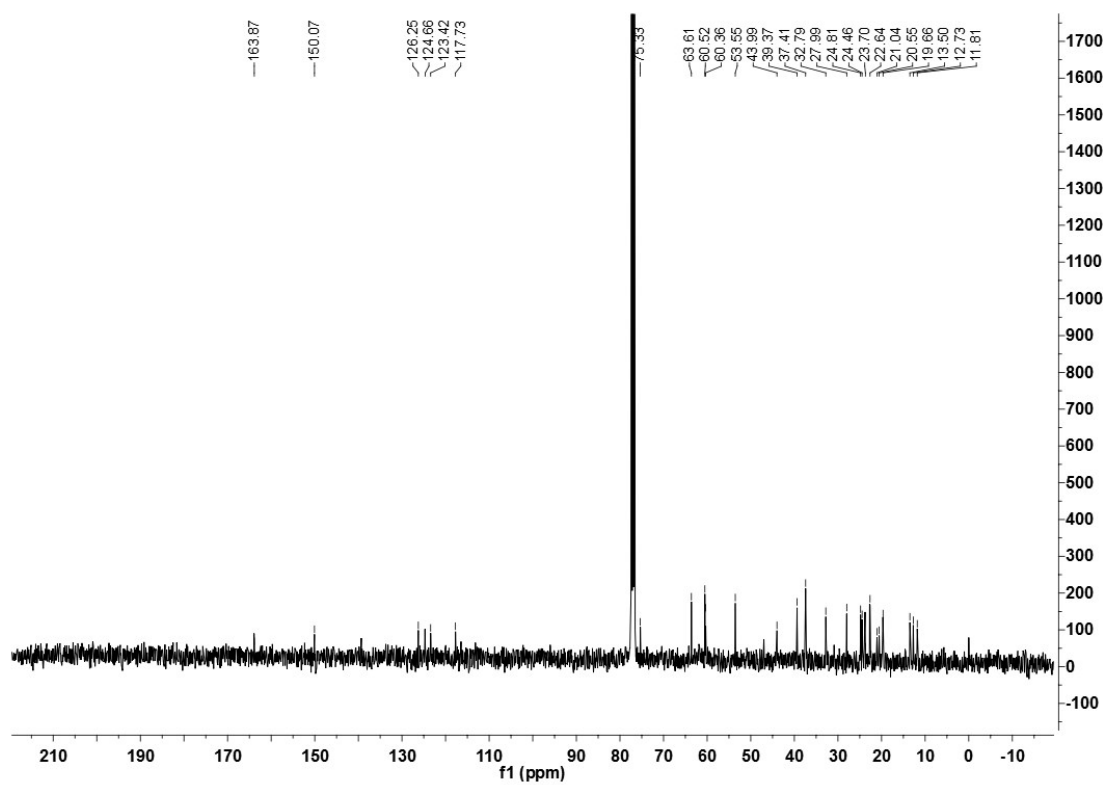

Fig. S17: <sup>13</sup>C-NMR Spectrum of Toc-Mor

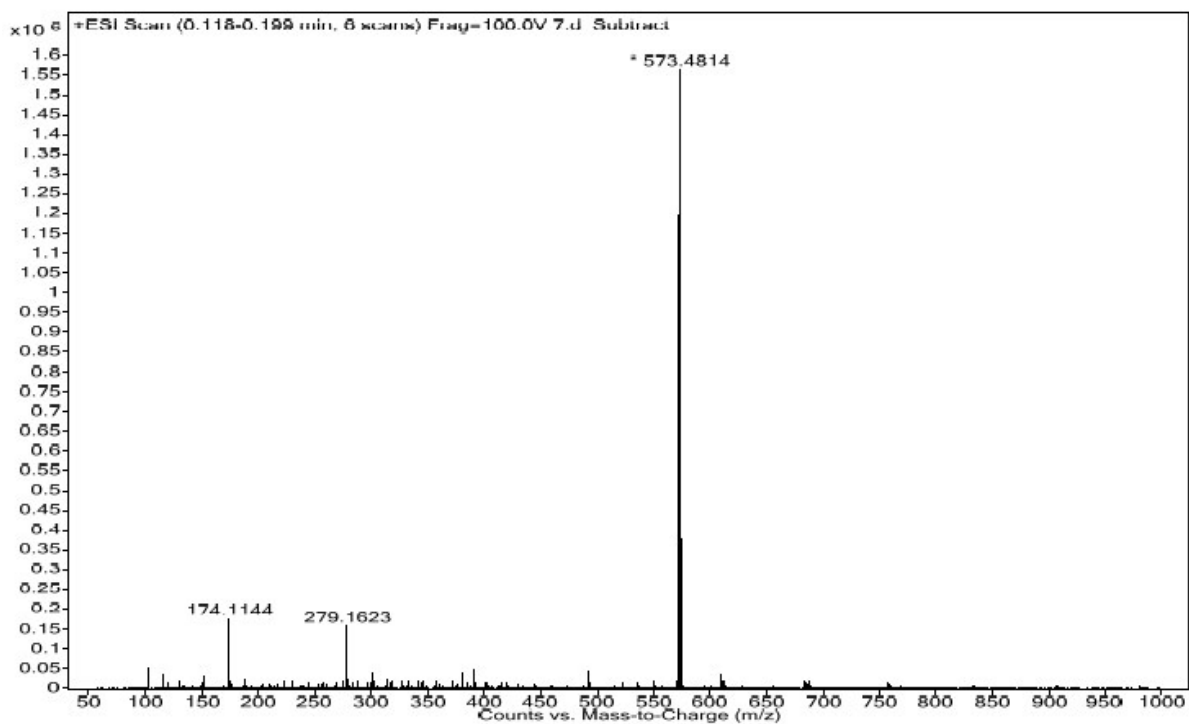

Fig. S18: ESI-MS (HRMS) Spectrum of Toc-Mor

(8) Toc-Im

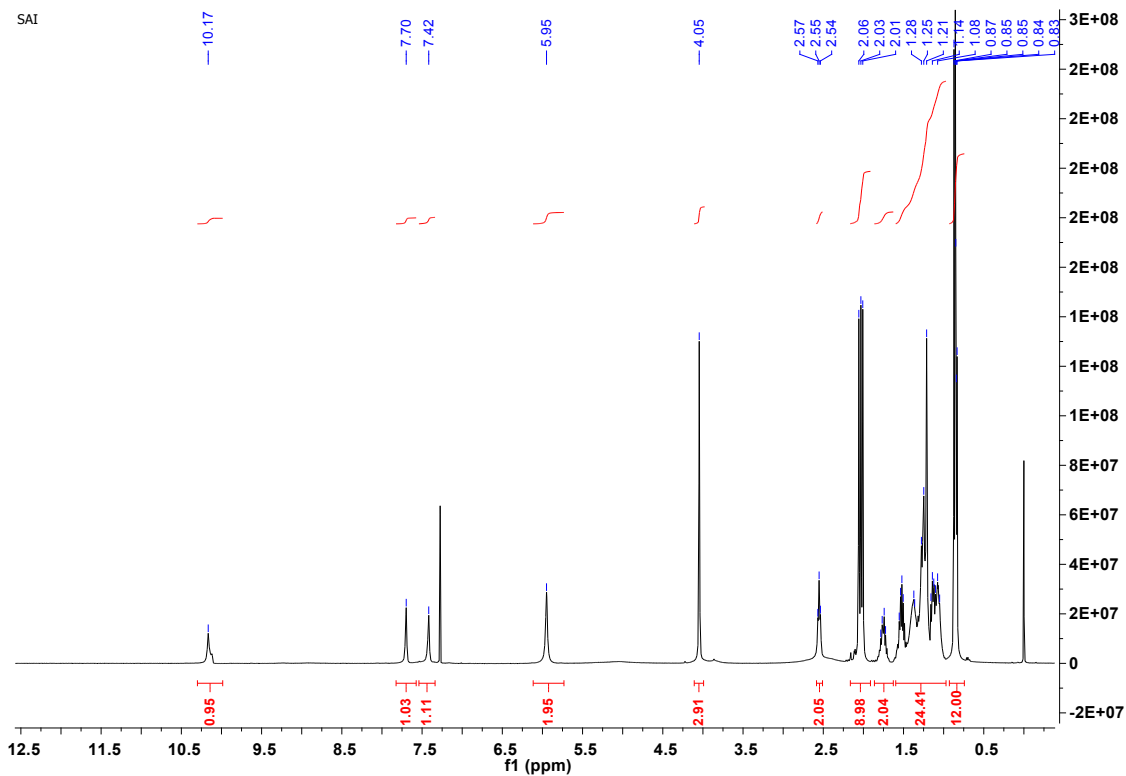

Fig. S19:  $^1\text{H-NMR}$  Spectrum of Toc-Im

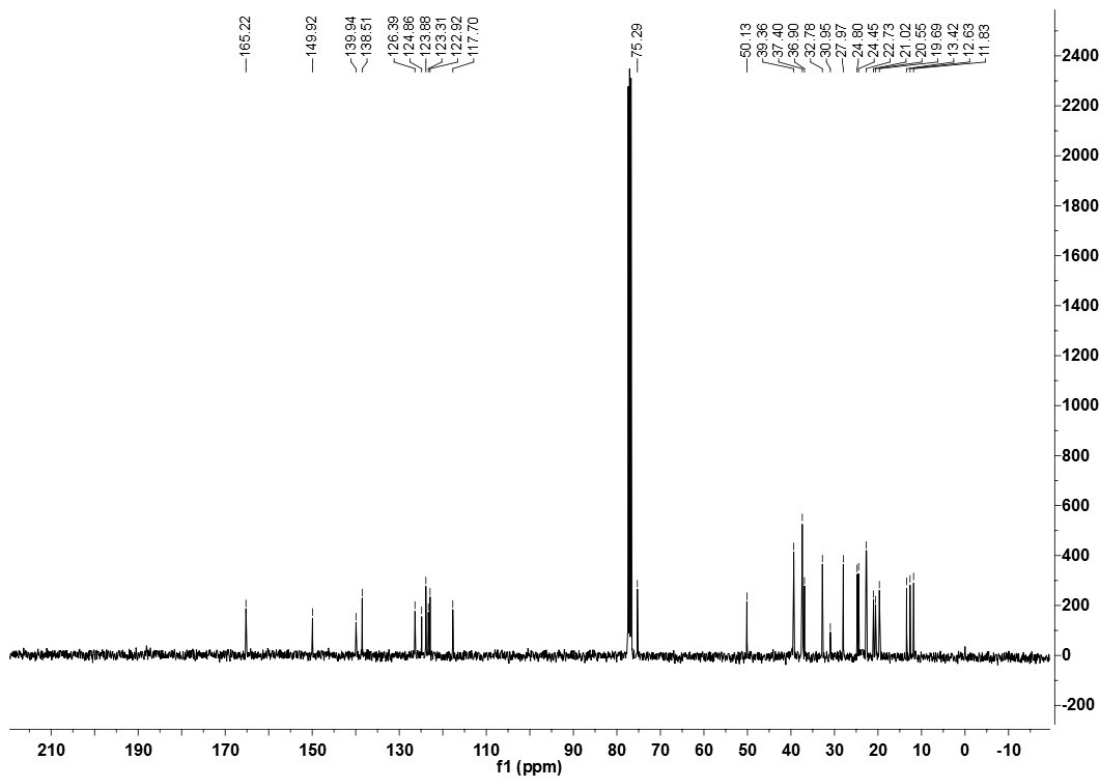

**Fig. S20:**  $^{13}\text{C}$ -NMR Spectrum of Toc-Im

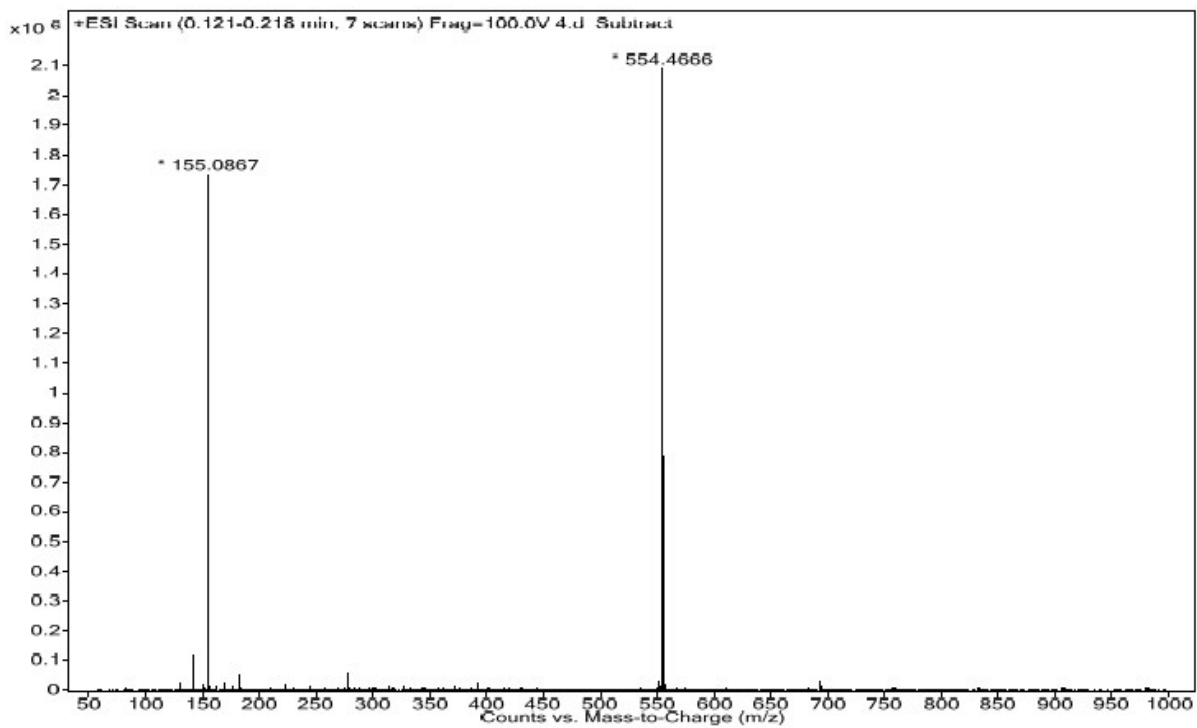

**Fig. S21:** ESI-MS (HRMS) Spectrum of Toc-Im

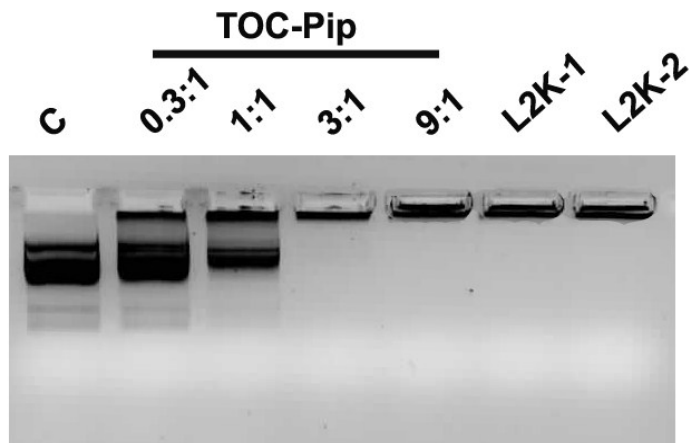

**Fig. S22:** Agarose gel binding assay using Toc-Pip with four different charge ratios (0.3:1, 1:1, 3:1 and 9:1) and Lipofectamine-2000 (L2K) as the control for comparison. L2K with two different concentrations (L2K-1: 0.8  $\mu$ l) and (L2K-2: 1.4  $\mu$ l optimal concentration) according to the manufacturer's protocol. 400 ng of plasmid pCMV $\beta$ -gal DNA/well was used. Gel depicts retention of lipoplexes prepared with Toc-Pip at 3:1 in the well.

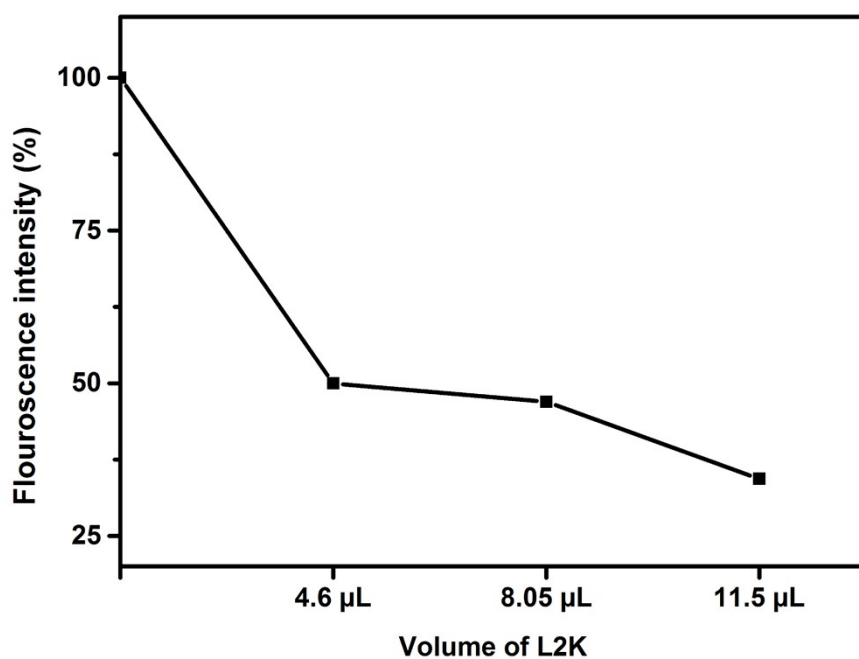

**Fig. S23:** Ethidium bromide displacement assay using Lipofectamine-2000 (L2K) at three different conditions 4.6  $\mu$ L, 8.05  $\mu$ L (optimal concentration), 11.5  $\mu$ L. The amount of plasmid DNA per titration is 2.3  $\mu$ g and L2K was used according to the manufacturer's protocol.

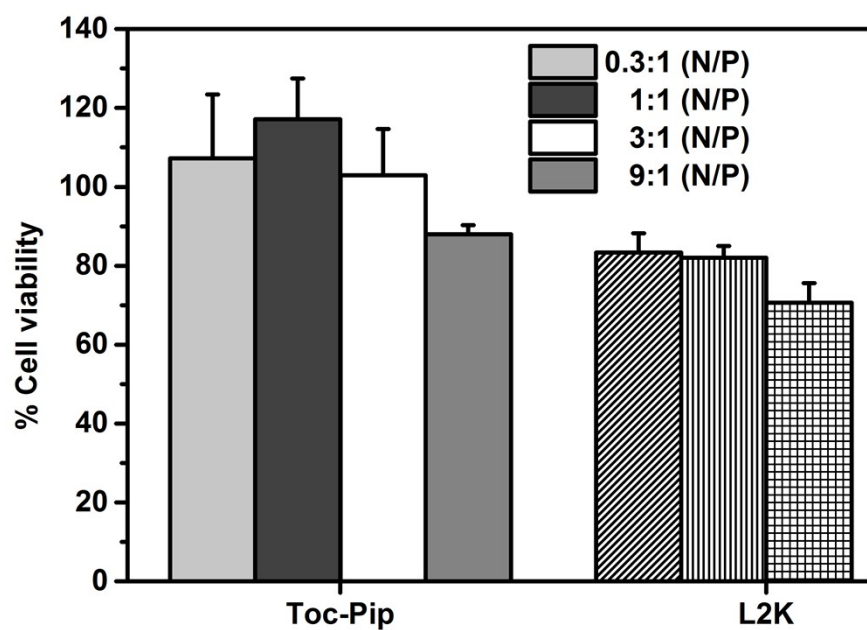

**Fig. S24:** Graph depicts comparative analysis of cell viability (%) of Lipid: DNA complex using MTT assay in Neuro-2a cell line: Lipoplexes were prepared with Toc-Pip formulated with DOPE and L2K was used as the positive control and assayed according to the protocol mentioned in methods. Diagonal lines (1.8 μL), vertical lines (3.15 μL), checks (4.5 μL).
